# Supplementary material for: Catalysis of the hydro-dechlorination of 4-chlorophenol by Pd(0)-modified MCM-48 mesoporous microspheres with an ultra-high surface area
Source: Royal Society of Chemistry journal article supplement (doi:10.1039/c5nj00617a), 2015-01-01
Supplement: c5nj00617a1.pdf [file c5nj00617a1.pdf]

1 **A study of Pd<sup>(0)</sup> modified MCM-48 mesoporous microsphere with ultrahigh**  
2 **surface area catalyzed hydrodechlorination of 4-Chlorophenol**

3 *Yansheng Liu, Xinlin Li, Xuanduong Le, Wei Zhang, Hao Gu, Ruiwen Xue and Jiantai Ma\**

4

5 *Gansu Provincial Engineering Laboratory for Chemical Catalysis, College of Chemistry and*

6 *Chemical Engineering, Lanzhou University, Lanzhou 730000, PR China.*

7 *\*Corresponding author, E-mail addresses: majiantai@lzu.edu.cn (Jiantai Ma).*

8 *Tel.: +86 0931 891 2577; Fax: +86 0931 891 2582*

9

10

11

12

13

14

15

16

17

18

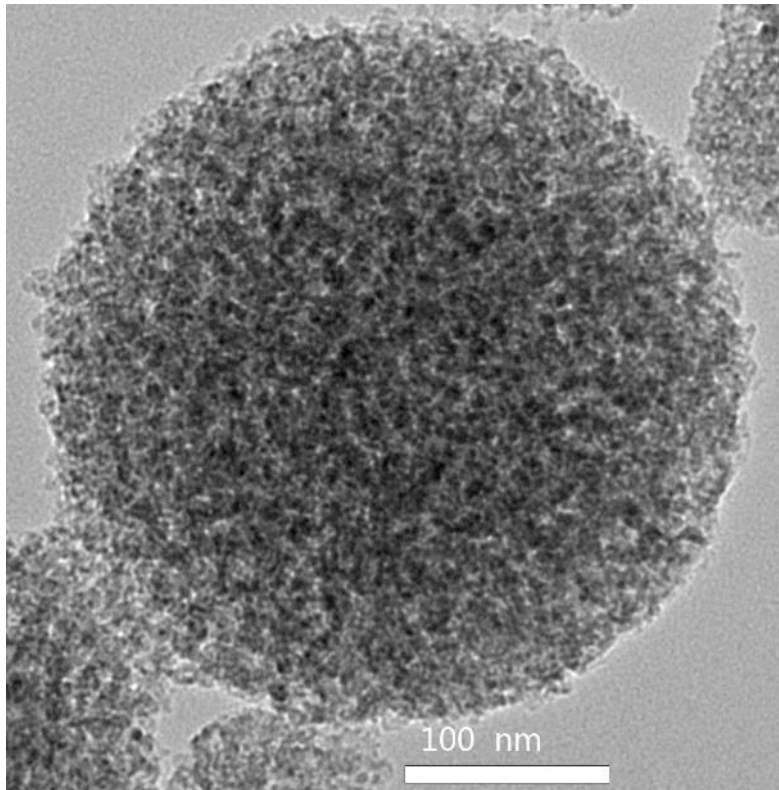

1

Figure S1. TEM image of used Pd/M48N
